# Supplementary material
Source: publisher site journal article supplement (https://cdn.jamanetwork.com/ama/content_public/journal/otol/936662/ooi170058supp1_prod.pdf)
Supplement: Supplementary file 1 [file ooi170058supp1_prod.pdf]

## Supplementary Online Content

Cramer JD, Dilger AE, Schneider A, Smith SS, Samant S, Patel UA. Comparison of risk of venous thromboembolism among otolaryngology patients vs general surgery and plastic surgery patients. *JAMA Otolaryngol*. Published online October 19, 2017. doi:10.1001/jamaoto.2017.1768

**eTable 1.** Codes Used for Selecting Cohort

**eTable 2.** Surgical Characteristics of Cohort

**eTable 3.** Rate of VTE Based on the Type of Cancer in Entire Cohort

This supplementary material has been provided by the authors to give readers additional information about their work.

**eTable 1.** Codes Used for Selecting Cohort

| <b>Head and neck site</b> | <b>ICD-O-3 Site Codes</b>                                                                  |
|---------------------------|--------------------------------------------------------------------------------------------|
| Oral cavity               | C-00.0-C00.9, C-02.0-02.3, C-02.8-03.1, C-03.9-04.1, C-04.8-05.2, C-05.8-06.2, C-06.8-06.9 |
| Oropharynx                | C-09.0-09.1, C-09.8-09.9, C-10.0-10.4, C-10.8-10.9, C-02.4, C-01.9, C14.0, 14.2, 14.8      |
| Larynx                    | C-32.0-32.3, C-32.8-32.9                                                                   |
| Hypopharynx               | C-12.9-13.2, <b>C13.8-13.9</b>                                                             |
|                           | <b>ICD-O-3 Histology Codes</b>                                                             |
| Squamous cell carcinoma   | 8052, 8070-8076, 8083-8084, 8094 8560                                                      |

Abbreviations; ICD-O-3 = International Classification of Diseases for Oncology, Third Edition

**eTable 2.** Surgical Characteristics of Cohort

| <b>Type of Surgery</b>                                                | <b>General Surgery</b>               | <b>Plastic Surgery</b>            | <b>Otolaryngology</b>             |
|-----------------------------------------------------------------------|--------------------------------------|-----------------------------------|-----------------------------------|
|                                                                       | <b>n = 1,236,115</b><br><b>n (%)</b> | <b>n = 27,280</b><br><b>n (%)</b> | <b>n = 31,896</b><br><b>n (%)</b> |
| Skin surgery                                                          | 15979 (1.3)                          | 7417 (27.4)                       | 1322 (4.1)                        |
| Breast surgery                                                        | 80015 (6.5)                          | 16325 (60.4)                      | 31 (0.1)                          |
| Musculoskeletal surgery                                               | 13237 (1.1)                          | 2166 (8.0)                        | 2056 (6.5)                        |
| Laryngeal/airway surgery                                              | 102 (0.0)                            | 1 (0.0)                           | 1164 (3.7)                        |
| Chest/lung surgery                                                    | 6298 (0.5)                           | 5 (0.0)                           | 3 (0.0)                           |
| Aneurysm, blood vessel, vascular surgery                              | 11358 (0.9)                          | 89 (0.3)                          | 54 (0.2)                          |
| Hemic system, spleen surgery                                          | 6791 (0.6)                           | 0 (0.0)                           | 0 (0.0)                           |
| Lymph node surgery                                                    | 6251 (0.5)                           | 46 (0.2)                          | 2659 (8.3)                        |
| Oral cavity surgery                                                   | 182 (0.0)                            | 98 (0.4)                          | 3765 (11.8)                       |
| Salivary gland surgery                                                | 455 (0.0)                            | 37 (0.1)                          | 3731 (11.7)                       |
| Tonsil/adenoid surgery                                                | 15 (0.0)                             | 1 (0.0)                           | 1926 (6.0)                        |
| Other oropharyngeal surgery                                           | 23 (0.0)                             | 1 (0.0)                           | 402 (1.3)                         |
| Esophageal surgery                                                    | 31761 (2.6)                          | 5 (0.0)                           | 287 (0.9)                         |
| Stomach, intestine, colon, anus, liver, pancreas, omentum, peritoneum | 619965 (50.5)                        | 61 (0.2)                          | 17 (0.1)                          |
| Appendix surgery                                                      | 141994 (11.6)                        | 6 (0.0)                           | 7 (0.0)                           |
| Biliary tract surgery                                                 | 127088 (10.4)                        | 4 (0.0)                           | 0 (0.0)                           |
| Hernia surgery                                                        | 89844 (7.3)                          | 615 (2.3)                         | 3 (0.0)                           |
| Endocrine surgery                                                     | 75738 (6.2)                          | 8 (0.0)                           | 13079 (41.1)                      |
| Skull base/neurological surgery                                       | 386 (0.0)                            | 144 (0.5)                         | 733 (2.3)                         |
| Otological surgery                                                    | 1 (0.0)                              | 0 (0.0)                           | 619 (1.9)                         |

**eTable 3.** Rate of VTE Based on the Type of Cancer in Entire Cohort

| <b>Cancer status</b>                  | <b>Rate of VTE</b> | <b>CI</b> |
|---------------------------------------|--------------------|-----------|
| No cancer (n = 1,015,605)             | 1.0%               | 1.0-1.1   |
| Any Cancer (n = 279,675)              | 1.8%               | 1.7-1.8   |
| Upper aerodigestive tract (n = 5,280) | 1.7%               | 1.3-2.0   |
| Thyroid (n = 22,036)                  | 0.2%               | 0.1-0.2   |
| Salivary gland (n = 4,259)            | 0.4%               | 0.2-1.0   |
| Skin (n = 4,259)                      | 1.5%               | 1.2-1.9   |
| Gastrointestinal (n = 132,591)        | 2.4%               | 2.3-2.5   |

Overall observed rate of VTE. Type of cancer determined from postoperative ICD-9 diagnosis. Abbreviations; CI = confidence interval.
